# Supplementary material for: Facile synthesis of nitrogen self-doped rutile TiO2 nanorods
Source: Royal Society of Chemistry journal article supplement (doi:10.1039/c2ce25827g), 2012-01-01
Supplement: c2ce25827g.pdf [file c2ce25827g.pdf]

## Electronic Supplementary Information

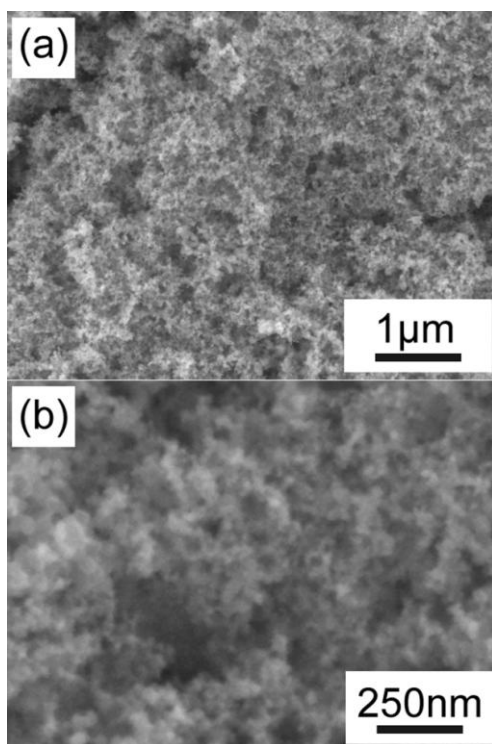

**Fig. S1** FESEM images of TiN precursor powder: (a) low and (b) high resolution

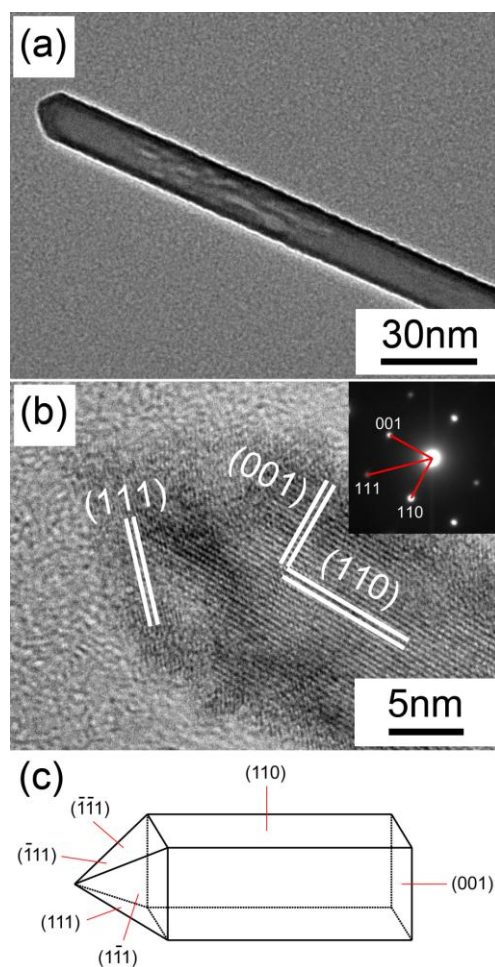

**Fig. S2** (a) TEM image of a single N-doped TiO<sub>2</sub> nanorod, (b) HRTEM image of the tapered tip in N-doped TiO<sub>2</sub> nanorod, the inset is corresponding SEAD pattern in the tip region, and (c) the schematic orientation relations of the {111} facets on the tapered tip.

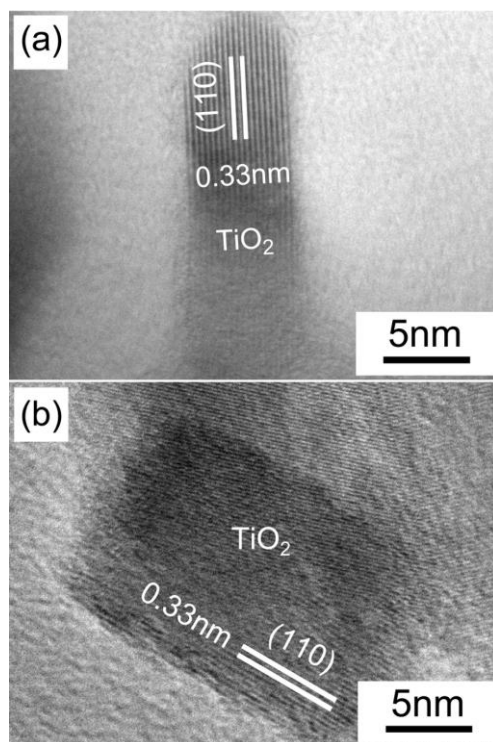

**Fig. S3** HRTEM images of TiO<sub>2</sub> nanocrystals from products hydrothermal treated for (a) 1 hr and (b) 2 hrs.

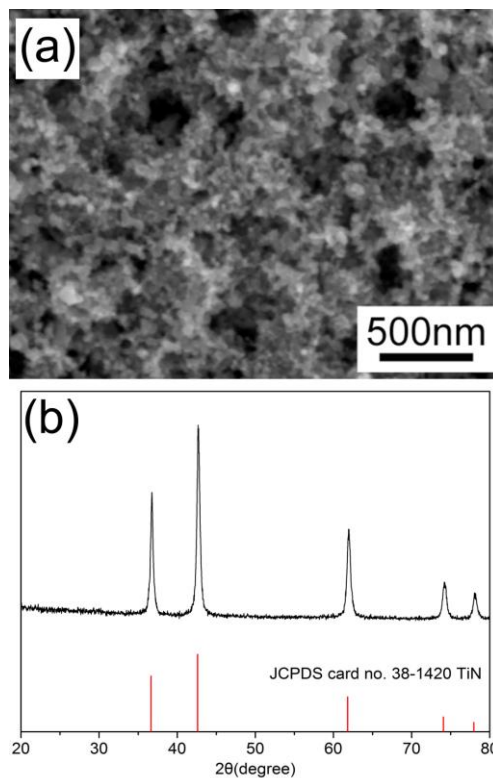

**Fig. S4** (a) FESEM image and (b) XRD pattern of the product hydrothermal treated at 180 °C for 12 hrs without HCl.

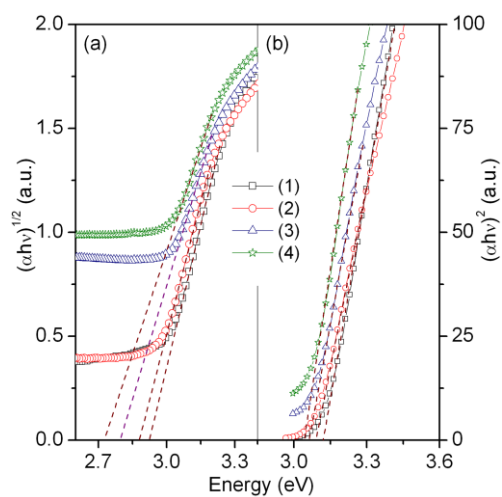

**Fig. S5** Plots of  $(\alpha h\nu)^n$  vs.  $h\nu$  for the N-doped TiO<sub>2</sub> nanorods: (a)  $n=1/2$  and (b)  $n=2$
